# Supplementary material
Source: PubMed Central journal article supplement (PMC1726661)
Supplement: emermedj_22_2_108__1.pdf [file emermedj_22_2_108__1.pdf]

|                   | Human factor                                                                                                                                                                                                                                                                                                 |                                                                                                                                                                                                                                   |                                                                                                                                                                                                   | Vehicle factor                                |                                                                 | Environment |                                           |
|-------------------|--------------------------------------------------------------------------------------------------------------------------------------------------------------------------------------------------------------------------------------------------------------------------------------------------------------|-----------------------------------------------------------------------------------------------------------------------------------------------------------------------------------------------------------------------------------|---------------------------------------------------------------------------------------------------------------------------------------------------------------------------------------------------|-----------------------------------------------|-----------------------------------------------------------------|-------------|-------------------------------------------|
|                   | Driver                                                                                                                                                                                                                                                                                                       | Passenger                                                                                                                                                                                                                         | Bus company management, transportation authorities                                                                                                                                                | Physical characteristics                      | Movement                                                        | Roads       | Stops                                     |
| <b>Pre-crash</b>  | <p>Acceleration and deceleration;</p> <p>Cornering speed;</p> <p>Waiting for passenger to be secure before starting;</p> <p>Waiting for passenger to be securely in bus before closing door</p> <p>Waiting for passenger to completely alight before closing door;</p> <p>Distance to sidewalk at stops;</p> | <p>Preparing exact change before boarding;</p> <p>Holding securely during bus movement;</p> <p>Not boarding when bus too crowded;</p> <p>Alighting rapidly without stopping;</p> <p>Yielding seats to the elderly and infirm;</p> | <p>Change driver work schedule (from trips/day);</p> <p>Strictly enforce driving habits;</p> <p>Proactively train drivers;</p> <p>Enact proactive surveillance and quality improvement plans;</p> | See text                                      | Electronic or mechanical limitations on acceleration and speed; | Bus lanes;  | Low steps from sidewalk;                  |
| <b>Crash</b>      | First aid procedures and training;                                                                                                                                                                                                                                                                           |                                                                                                                                                                                                                                   |                                                                                                                                                                                                   | Padding of protruding components;<br><br>ABS? |                                                                 |             |                                           |
| <b>Post-crash</b> | Immediate transportation to hospital;<br>Immediate, accurate reporting                                                                                                                                                                                                                                       |                                                                                                                                                                                                                                   | <p>Incident investigation;</p> <p>Responsiveness to passenger complaints;</p> <p>Strict driver discipline system;</p> <p>Data collection;</p>                                                     |                                               |                                                                 |             | Enact changes indicated by investigation; |
